# Supplementary material
Source: publisher site journal article supplement (https://www.spandidos-publications.com/3874/downloadSupplementary)

Figure S1. Three-dimensional scatter plot showing the association among radiation dose, micronuclei frequency and expression of miRNAs. The 12 miRNAs of focus in the present study were plotted. miRNA/miR, microRNA.

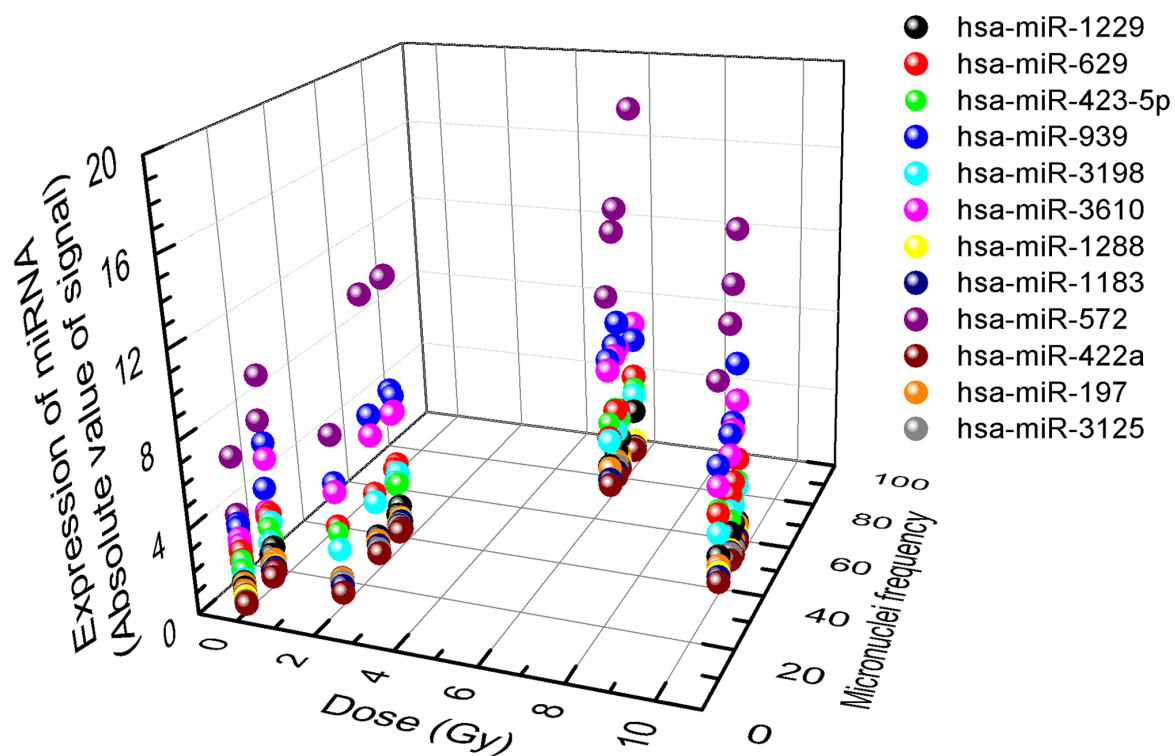

Supplement: Supplementary file 1 [file downloadSupplementary]
